# Supplementary material for: Homozygous ARHGEF2 mutation causes intellectual disability and midbrain-hindbrain malformation
Source: PubMed Central journal article supplement (PMC5428974; doi:10.1371/journal.pgen.1006746), 2017-04-28
Supplement: pgen.1006746.s001.pdf [file pgen.1006746.s001.pdf]

**S1 Table. Phenotype of patients with homozygous *ARHGEF2* mutation.**

| Characteristics and Symptoms                                           | HPO ID <sup>a</sup> | Patient      | Patient     |
|------------------------------------------------------------------------|---------------------|--------------|-------------|
| Pedigree ID                                                            | NA                  | II.1         | II.2        |
| Origin                                                                 | NA                  | Kurd         | Kurd        |
| Gender                                                                 | NA                  | male         | male        |
| Age at last assessment (years)                                         | NA                  | 5.9          | 4.5         |
| <b>Head</b>                                                            |                     |              |             |
| (Infantile) congenital microcephaly (OFC < P3)                         | 0011451             | +            | (+)         |
| High palate                                                            | 0000218             | +            | -           |
| Downslanted palpebral fissures                                         | 0000494             | +            | -           |
| Long eyelashes                                                         | 0000527             | +            | +           |
| Bilateral ptosis                                                       | 0001488             | +            | -           |
| Congenital strabismus                                                  | 0000487             | +            | +           |
| Astigmatism                                                            | 0000483             | +            | +           |
| Horizontal pendular nystagmus                                          | 0007811             | -            | +           |
| Amblyopia                                                              | 0000646             | -            | +           |
| Optic disc pallor                                                      | 0000543             | -            | +           |
| Abnormality of the retinal pigmentation                                | 0008051             | -            | +           |
| <b>Chest</b>                                                           |                     |              |             |
| Wide intermamillary distance                                           | 0006610             | +            | -           |
| <b>Skeletal</b>                                                        |                     |              |             |
| Broad finger                                                           | 0001500             | +            | -           |
| <b>Skin, Hair</b>                                                      |                     |              |             |
| Skin rash                                                              | 0000988             | +            | -           |
| Low posterior hairline                                                 | 0002162             | +            | -           |
| <b>Neurologic</b>                                                      |                     |              |             |
| Intellectual disability, mild (IQ equivalent; years at assessment)     | 0001256             | + (68; 1.5)  | -           |
| Intellectual disability, moderate (IQ equivalent; years at assessment) | 0002342             | + (<50; 2.2) | + (46; 0.6) |
| Delayed speech and language development                                | 0000750             | +            | +           |
| Muscular hypotonia                                                     | 0001252             | +            | -           |
| Hypoplasia of the pons                                                 | 0012110             | +            | +           |
| Cerebellar vermis hypoplasia                                           | 0001320             | -            | +           |
| Abnormal auditory evoked potentials                                    | 0006958             | +            | -           |
| Abnormality of vision evoked potentials                                | 0000649             | -            | +           |

<sup>a</sup>All symptoms are listed according to the nomenclature and the systematics of the OMIM "Clinical Synopsis" and the Human Phenotype Ontology (HPO; <http://www.human-phenotype-ontology.org/>) according to Robinson et al. 2008.(1) Abbreviations: AR, autosomal recessive; HPO, human phenotype ontology; IQ, intelligence quotient; OFC, occipito-frontal head circumference; NA, not applicable; OMIM, (Online Mendelian Inheritance in Man); P, percentile.

## References

1. Robinson PN, Kohler S, Bauer S, Seelow D, Horn D, Mundlos S. The Human Phenotype Ontology: a tool for annotating and analyzing human hereditary disease. *Am J Hum Genet.* 2008;83(5):610-5.
