# Supplementary material for: Homozygous ARHGEF2 mutation causes intellectual disability and midbrain-hindbrain malformation
Source: PubMed Central journal article supplement (PMC5428974; doi:10.1371/journal.pgen.1006746), 2017-04-28
Supplement: pgen.1006746.s003.pdf [file pgen.1006746.s003.pdf]

**S3 Table. Development of affected patients from two months through two years.**

| Characteristics and Features                  | Norms (months) <sup>a</sup> | Patient                   | Patient |
|-----------------------------------------------|-----------------------------|---------------------------|---------|
| Pedigree ID                                   | NA                          | II.1                      | II.2    |
| Lifts head up for several seconds while prone | 2                           | 9                         | ND      |
| Rolls from prone to supine                    | 5-6                         | ND                        | 6       |
| Babbles                                       | 5-6                         | ND                        | 7       |
| Says „da-da“, „ba-ba“                         | 7 - 8                       | ND                        | 11      |
| Sits well without support                     | 9-10                        | 9                         | ND      |
| Pulls self to sit                             | 9-10                        | 9.5                       | ND      |
| Walks with assistance                         | 11-12                       | ND                        | 11      |
| Uses two to four words with meaning           | 11-12                       | 39                        | 27      |
| Creeps well                                   | 11-12                       | 9                         | 11      |
| Walks by self                                 | 13-15                       | 18                        | 15      |
| Speaks in two- or three-word sentences        | 24                          | 75                        | 55      |
|                                               |                             | (two-word sentences only) |         |

<sup>a</sup>Normal values according to Swaiman KF 2006. [1] Abbreviations: NA, not applicable; ND, not determined.

## References

1. Swaiman K. Pediatric Neurology: Principles & Practice: Neurologic examination after the newborn period until 2 years of age. . 1 vol. 4 ed. Philadelphia, USA: Mosby, 2006
