# Supplementary material for: Homozygous ARHGEF2 mutation causes intellectual disability and midbrain-hindbrain malformation
Source: PubMed Central journal article supplement (PMC5428974; doi:10.1371/journal.pgen.1006746), 2017-04-28
Supplement: pgen.1006746.s004.pdf [file pgen.1006746.s004.pdf]

**S4 Table. Regions of homozygosity (> 1 Mb) between patients II.1 and II.2.**

chr1:22336277-35184084  
chr1:53990321-59248813  
chr1:103352451-120512104  
chr1:145517561-214504604 (ROH containing *ARHGEF2*)  
chr1:240939391-248512498  
chr2:56411817-66667186  
chr2:143913004-158401137  
chr3:71015021-73004157  
chr3:105400846-13340249  
chr4:33240041-36081878  
chr4:167932327-169086441  
chr5:38959794-56416688  
chr5:99921841-105752888  
chr5:172659511-173907351  
chr6:20144637-22570064  
chr6:97677118-99283376  
chr7:118591040-120613419  
chr7:155750033-156762446  
chr8:42959007-47757290  
chr8:126369898-128099269  
chr8:139889972-141034189  
chr9:9090876-11012433  
chr9:80919756-82189914  
chr9:122001000-123671520  
chr10:1421516-2797555  
chr11:25100229-26552702  
chr11:83691458-85373668  
chr11:130749715-132177633  
chr12:29650702-30815157  
chr12:90147264-91334194  
chr13:67802339-69559248  
chr13:81230929-83719952  
chr14:86088056-88416390  
chr15:95399291-97326748  
chr16:58743454-60688861  
chr17:53638670-54939715  
chr18:68893756-70209321  
chr20:18531499-19634747  
chr21:21112411-22841123  
chr22:29130300-36695247
