# Supplementary material for: Homozygous ARHGEF2 mutation causes intellectual disability and midbrain-hindbrain malformation
Source: PubMed Central journal article supplement (PMC5428974; doi:10.1371/journal.pgen.1006746), 2017-04-28
Supplement: pgen.1006746.s005.pdf [file pgen.1006746.s005.pdf]

**S5 Table. Primer sequences for qPCR, *in situ* hybridization, and site-directed mutagenesis.**

| <b>Primer</b>      | <b>Sequence (5'-&gt;3')</b>      | <b>Species</b> |
|--------------------|----------------------------------|----------------|
| <i>hARHGEF2-F</i>  | ACCTTCATCCCCCTTCCAGAT            | human          |
| <i>hARHGEF2-R</i>  | GGCAGGAAAGCAAGAAGAGA             | human          |
| <i>hARHGEF2- F</i> | CCCTCATCTGCCCAACCTG              | human          |
| <i>hARHGEF2- R</i> | CAAGGCGGTGTTGTTCTTCA             | human          |
| <i>hRP11- F</i>    | GCACCACGTCCAATGACAT              | human          |
| <i>hRP11- R</i>    | TCATGAGTGGTCCTGTGTCC             | human          |
| <i>hARHGEF2- F</i> | CATCTTTCCTACCCTGACAAGCCTTCAGTGG  | human          |
| <i>hARHGEF2- R</i> | CCACTGAAGGCTTGTTCAGGGTAGGAAAGATG | human          |
| <i>Arhgef2-F</i>   | TCCCTTATTGATGAAGGTGTAGAAG        | mouse          |
| <i>Arhgef2-R</i>   | GTCTCGAGCATAACAGCTCCTTATAG       | mouse          |
