# Supplementary material for: Homozygous ARHGEF2 mutation causes intellectual disability and midbrain-hindbrain malformation
Source: PubMed Central journal article supplement (PMC5428974; doi:10.1371/journal.pgen.1006746), 2017-04-28
Supplement: pgen.1006746.s006.pdf [file pgen.1006746.s006.pdf]

**S6 Table. List of primary antibodies.**

| <b>Antibody</b>                   | <b>Source</b>     | <b>Catalog No.</b> | <b>Host</b>           | <b>Dilution</b> |
|-----------------------------------|-------------------|--------------------|-----------------------|-----------------|
| Actin                             | Millipore         | MAB1501            | Mouse monoclonal      | 1:10,000        |
| Alpha-tubulin                     | Sigma-Aldrich     | T9026              | Mouse monoclonal      | 1:1500          |
| ARHGEF2(55B6)                     | Cell Signaling    | 4076               | Rabbit monoclonal     | 1:1000          |
| ARHGEF2                           | Cell Signaling    | 4145               | Rabbit polyclonal     | 1:1000          |
| $\beta$ -III-tubulin              | Covance           | MMS-435P-250       | Mouse monoclonal      | 1:1000          |
| CDK5RAP2 (N1)                     | Self-generated    | -                  | Rabbit polyclonal     | 1:10,000        |
| CDK5RAP2                          | Sigma-Aldrich     | HPA035820          | Rabbit polyclonal     | 1:200           |
| GFP                               | Abcam             | AB13970            | Chicken polyclonal    | 1:1000          |
| $\gamma$ -tubulin                 | Sigma-Aldrich     | T6557              | Mouse monoclonal      | 1:500           |
| Ki67                              | BD Pharmingen     | 556003             | Mouse monoclonal      | 1:200           |
| MLC-2                             | Cell Signaling    | 3672               | Rabbit polyclonal     | 1:1000          |
| Mbh2                              | Novus Biologicals | NBP1-86513         | Rabbit polyclonal     | 1:200           |
| p-MLC (Ser 19)                    | Cell Signaling    | 3671               | Rabbit polyclonal     | 1:1000          |
| RhoA                              | Cytoskeleton      | ARH03              | Mouse monoclonal      | 1:500           |
| Phalloidin                        | Sigma-Aldrich     | P1951              | --                    | 1:100           |
| Phospho-histone H3 (Ser10) (p-H3) | Cell Signaling    | 9706               | Mouse monoclonal      | 1:25            |
| Tlx3                              | Self-generated    | -                  | Guinea pig polyclonal | 1:10,000        |
| SatB2                             | Abcam             | ab92446            | Rabbit monoclonal     | 1:400           |
| Vinculin                          | Sigma-Aldrich     | V9131              | Mouse monoclonal      | 1:10,000        |
| Olig3                             | Self-generated    | -                  | Guinea pig polyclonal | 1:10,000        |
